# Supplementary material
Source: MDPI journal article supplement (https://www.mdpi.com/2311-5637/10/1/66)
Supplement: s1 [file s1]

Archive with 2 entries (2 files):
- fermentation-2793345-supplementary Figures.pdf
- fermentation-2793345-Supplementary Tables.xlsx
