# Supplementary material
Source: MDPI journal article supplement (https://www.mdpi.com/2311-5637/10/1/66)
Supplement: s1 [file s1 › fermentation-2793345-Supplementary Tables.xlsx]

## Sheet: Table S1
Table S1 Taxonomy of bacterial ASVs and corresponding reads.
ASVs	kingdom	phylum	class	order	family	genus	species	confidence	reads
0491eee73ff9df530ff2a31a73e91e2d	Bacteria	Proteobacteria	Gammaproteobacteria	Enterobacterales	Enterobacteriaceae	unidentified	unidentified	0.916095	15
05935203b86eaeac17d03e8905ca5d0d	Bacteria	Proteobacteria	Gammaproteobacteria	Burkholderiales	Chromobacteriaceae	Vogesella	unidentified	0.999999	208
076b6a8b7ca3cce6c846a1dd1868069f	Bacteria	Proteobacteria	Gammaproteobacteria	Enterobacterales	Enterobacteriaceae	unidentified	unidentified	0.957412	51
099500eb178058469cb6a5350db0ebb7	Bacteria	Firmicutes	Bacilli	Lactobacillales	Lactobacillaceae	Lactobacillus	unidentified	0.999178	86
0a1dcae14e3e227f47cb1cd69f6aa793	Bacteria	Proteobacteria	Gammaproteobacteria	Enterobacterales	Enterobacteriaceae	unidentified	unidentified	0.927314	561
0de8e0b1910c8ffed57fd59e29526f02	Bacteria	Proteobacteria	Gammaproteobacteria	Pseudomonadales	Moraxellaceae	Acinetobacter	unidentified	1	7787
106e6b17a6a866f059edb6046bdfd2ed	Bacteria	Firmicutes	Bacilli	Lactobacillales	Enterococcaceae	Enterococcus	unidentified	0.999909	6774
120b95845bb468c86784ff60449f0c2f	Bacteria	Firmicutes	Bacilli	Lactobacillales	Lactobacillaceae	Lactobacillus	Lactobacillus kefiri	0.875513	7692
1263219b90c156d410179b7e11c712f6	Bacteria	Proteobacteria	Gammaproteobacteria	Enterobacterales	Enterobacteriaceae	Raoultella	unidentified	0.923666	1924
143ff21ad6aaff37be2dd2af2c1727a7	Bacteria	Firmicutes	Bacilli	Lactobacillales	Leuconostocaceae	Leuconostoc	Leuconostoc mesenteroides	0.759271	7337
16cc777cac4417f7fb7f6d31e6449267	Bacteria	Proteobacteria	Gammaproteobacteria	Aeromonadales	Aeromonadaceae	Aeromonas	unidentified	0.726752	55
185c3a1ca7eb347989a36f637efbf1d4	Bacteria	Proteobacteria	Gammaproteobacteria	Enterobacterales	Enterobacteriaceae	Enterobacter	unidentified	0.701076	680
18d1990d3aced7fbf7bbdaa993b237d3	Bacteria	Proteobacteria	Gammaproteobacteria	Pseudomonadales	Moraxellaceae	Acinetobacter	unidentified	0.999987	28
1bab09f0563c690de11f10979f3f8bbb	Bacteria	Firmicutes	Bacilli	Lactobacillales	Lactobacillaceae	Lactobacillus	unidentified	0.999986	102
1bb553fd04267230a259d8dff3fd26ef	Bacteria	Bacteroidota	Bacteroidia	Flavobacteriales	Weeksellaceae	Chryseobacterium	unidentified	0.999998	112
1ccf38eac19255b4f5761f526a00b3ae	Bacteria	Firmicutes	Bacilli	Lactobacillales	Streptococcaceae	Lactococcus	unidentified	1	288
1cfd2d80fa1841593c2716552dd6cba3	Bacteria	Proteobacteria	Gammaproteobacteria	Enterobacterales	Enterobacteriaceae	unidentified	unidentified	0.939677	11
2016760fe21d3993d7657c2195ac3136	Bacteria	Proteobacteria	Gammaproteobacteria	Enterobacterales	Enterobacteriaceae	unidentified	unidentified	0.995198	33
21620a2f4231ee76ff68ba5f4d70a6a4	Bacteria	Proteobacteria	Gammaproteobacteria	Enterobacterales	Yersiniaceae	Serratia	unidentified	0.998711	132
22a5cba8be32bfb9b7a0ea9e416ff777	Bacteria	Proteobacteria	Gammaproteobacteria	Pseudomonadales	Moraxellaceae	Acinetobacter	unidentified	1	1430
23a01a594edf18d26c856fd51d6fbac5	Bacteria	Patescibacteria	Saccharimonadia	Saccharimonadales	Saccharimonadales	Saccharimonadales	uncultured gamma	0.889418	30
23b0f2b07361b8f5506b415dc9feb207	Bacteria	Proteobacteria	Gammaproteobacteria	Enterobacterales	unidentified	unidentified	unidentified	1	41
24bb520dbdf1b674311fbe4ee2e83a19	Bacteria	Proteobacteria	Gammaproteobacteria	Enterobacterales	Enterobacteriaceae	unidentified	unidentified	0.904368	69
2bb7fed073e9a28e9df934d2cd1e10e0	Bacteria	Bacteroidota	Bacteroidia	Sphingobacteriales	Sphingobacteriaceae	Sphingobacterium	Sphingobacterium faecium	0.861286	57
2c060b0546e1b72abdfd39353766db9f	Bacteria	Firmicutes	Bacilli	Lactobacillales	Lactobacillaceae	Lactobacillus	unidentified	0.999994	52
2c31e38b953b62d4492eb4fac4d3d27e	Bacteria	Firmicutes	Bacilli	Lactobacillales	Streptococcaceae	Lactococcus	Lactococcus garvieae	0.705303	54
2cd4a104a17ceb87713d6724cb431350	Bacteria	Firmicutes	Bacilli	Lactobacillales	Streptococcaceae	Streptococcus	Streptococcus parauberis	0.999374	2742
317a575649f33ed32f7787268da3d2f1	Bacteria	Firmicutes	Bacilli	Lactobacillales	Streptococcaceae	Streptococcus	Streptococcus parauberis	0.999992	80870
3278b7ed8d41deffcd59cfe52d99d020	Bacteria	Bacteroidota	Bacteroidia	Flavobacteriales	Weeksellaceae	Empedobacter	Empedobacter brevis	0.998077	42
32b3ac8eb67bb8460063955246dd32f5	Bacteria	Firmicutes	Bacilli	Lactobacillales	Streptococcaceae	Streptococcus	Streptococcus parauberis	0.996762	24
34d14331858122ab278b07b49c320c16	Bacteria	Proteobacteria	Gammaproteobacteria	Enterobacterales	Enterobacteriaceae	Raoultella	unidentified	0.892924	487
398aca4ce70b3aca3f6ced06c80a40ee	Bacteria	Firmicutes	Bacilli	Lactobacillales	Lactobacillaceae	Lactobacillus	unidentified	0.996256	40
39d2acac8a96bd22231b38781b050c84	Bacteria	Proteobacteria	Gammaproteobacteria	Pseudomonadales	Moraxellaceae	Acinetobacter	unidentified	1	87
3a8ba15487d6fe2172dcfa2ab200d86c	Bacteria	Firmicutes	Bacilli	Lactobacillales	Streptococcaceae	Streptococcus	unidentified	0.706283	50
3b91d8fd7dc57a941d49bed1b084064d	Bacteria	Proteobacteria	Gammaproteobacteria	Pseudomonadales	Moraxellaceae	Acinetobacter	unidentified	1	12616
3cd52911420890fefd2099553411fdb4	Bacteria	Proteobacteria	Gammaproteobacteria	Aeromonadales	Aeromonadaceae	Aeromonas	unidentified	0.964181	889
3e39bdc1e1bca39e0a6f7dcee676613c	Bacteria	Proteobacteria	Gammaproteobacteria	Pasteurellales	Pasteurellaceae	Nicoletella	Nicoletella semolina	0.999996	78
3f1c9924b68432492574328ee194ac9b	Bacteria	Proteobacteria	Gammaproteobacteria	Enterobacterales	Enterobacteriaceae	unidentified	unidentified	0.952205	141
3f6142c1c80fa2a68eecd847ceccce7b	Bacteria	Proteobacteria	Gammaproteobacteria	Enterobacterales	unidentified	unidentified	unidentified	1	28
42750755b5332ebba3f97ac143b16cc7	Bacteria	Proteobacteria	Gammaproteobacteria	Enterobacterales	Enterobacteriaceae	unidentified	unidentified	0.989719	19
43378943cf516cf0093553a4432f4813	Bacteria	Firmicutes	Bacilli	Lactobacillales	Lactobacillaceae	Lactobacillus	unidentified	0.999026	732
44c45bd693a12beb1f777cb8ff6f7f7d	Bacteria	Proteobacteria	Gammaproteobacteria	Enterobacterales	Enterobacteriaceae	unidentified	unidentified	0.991762	15
48687139af707c0bb247f6f36bd9526a	Bacteria	Firmicutes	Bacilli	Lactobacillales	Lactobacillaceae	Lactobacillus	Lactobacillus helveticus	0.771444	5350
487d7a52d5419c8d5625fc9bbfc9debe	Bacteria	Proteobacteria	Gammaproteobacteria	Burkholderiales	Comamonadaceae	Comamonas	Comamonas koreensis	0.981411	44
49787670a37e6edc55de2ae59a3f4865	Bacteria	Bacteroidota	Bacteroidia	Sphingobacteriales	Sphingobacteriaceae	Sphingobacterium	Sphingobacterium faecium	0.885487	165
49f9e747c0d090dbb3caaac1e50d9c82	Bacteria	Proteobacteria	Gammaproteobacteria	Enterobacterales	Enterobacteriaceae	unidentified	unidentified	0.79528	75
4bd69b7daf9d8c58b8c73c4987981bc5	Bacteria	Firmicutes	Bacilli	Lactobacillales	Lactobacillaceae	Lactobacillus	Lactobacillus kefiranofaciens	0.838966	36570
4c55976e7d6566f3571cd0075bc51aae	Bacteria	Proteobacteria	Gammaproteobacteria	Pseudomonadales	Pseudomonadaceae	Pseudomonas	Pseudomonas brenneri	0.712042	92
4c984feed305a1835ed619f6d4661c38	Bacteria	Firmicutes	Bacilli	Staphylococcales	Staphylococcaceae	Macrococcus	Macrococcus caseolyticus	0.730493	155
4dc47eddf8ca3eb083362d1ac059a8da	Bacteria	Firmicutes	Bacilli	Lactobacillales	Lactobacillaceae	Lactobacillus	unidentified	0.817348	22
4f5fb2b2cfe09ba852a631aff45f8eee	Bacteria	Firmicutes	Bacilli	Lactobacillales	Lactobacillaceae	Lactobacillus	unidentified	0.992045	39
50334c012661047467823bb7b74dbdcd	Bacteria	Bacteroidota	Bacteroidia	Flavobacteriales	Weeksellaceae	Chryseobacterium	Chryseobacterium joostei	0.836852	2864
5060a417cecb2477803920f679600168	Bacteria	Firmicutes	Bacilli	Lactobacillales	Enterococcaceae	Enterococcus	Enterococcus italicus	0.818639	4547
50e196d3973bf2bd15314e112034c913	Bacteria	Firmicutes	Bacilli	Lactobacillales	Lactobacillaceae	Lactobacillus	unidentified	0.99854	75
51372cc76355b15e9f9cafe866c38184	Bacteria	Proteobacteria	Gammaproteobacteria	Enterobacterales	Yersiniaceae	Yersinia	unidentified	0.98503	54
521489da6839436b3111d64f01e42037	Bacteria	Firmicutes	Bacilli	Lactobacillales	Lactobacillaceae	Lactobacillus	unidentified	0.999994	32
52755e91c7fd2754176d9a612b32f3ee	Bacteria	Firmicutes	Bacilli	Lactobacillales	Lactobacillaceae	Lactobacillus	Lactobacillus kefiranofaciens	0.823601	49
5391a1857c8728aaddd49e3f8bbfecd1	Bacteria	Proteobacteria	Gammaproteobacteria	Enterobacterales	Enterobacteriaceae	unidentified	unidentified	0.958134	510
53c9d55956ac5a338094c24ffae06fc2	Bacteria	Firmicutes	Bacilli	Lactobacillales	Lactobacillaceae	Lactobacillus	unidentified	0.99434	141
5416640de7a7729f086c5a7e6cbb7766	Bacteria	Firmicutes	Bacilli	Lactobacillales	Enterococcaceae	Enterococcus	unidentified	0.999433	366
54a548064126ddc760db8acbc0f6c095	Bacteria	Proteobacteria	Gammaproteobacteria	Pseudomonadales	Pseudomonadaceae	Pseudomonas	unidentified	0.999997	100
5b3f544405debcf81572491ac4ccc4ef	Bacteria	Bacteroidota	Bacteroidia	Flavobacteriales	Weeksellaceae	Empedobacter	Empedobacter brevis	0.992757	591
5bfa0391c88a8e8a6cadb022bcbc2c2e	Bacteria	Proteobacteria	Gammaproteobacteria	Enterobacterales	Enterobacteriaceae	Enterobacter	unidentified	0.71983	69
5d6b5125c808b4faa6deb177d423e47c	Bacteria	Firmicutes	Bacilli	Lactobacillales	Streptococcaceae	Streptococcus	unidentified	0.886824	43
5df5395943cfa6c0997706511dec530d	Bacteria	Proteobacteria	Gammaproteobacteria	Pseudomonadales	Moraxellaceae	Acinetobacter	unidentified	0.999993	50
617548f8e9248416055ca0210aeca663	Bacteria	Firmicutes	Bacilli	Lactobacillales	unidentified	unidentified	unidentified	0.99999	838
628945dfd73e882bc89f8e009b87b481	Bacteria	Proteobacteria	Gammaproteobacteria	Enterobacterales	Enterobacteriaceae	unidentified	unidentified	0.998993	4831
62a35d30a1f3e005c2fd3f8f26e7bf86	Bacteria	Proteobacteria	Gammaproteobacteria	Pseudomonadales	Moraxellaceae	Acinetobacter	unidentified	0.999987	16
634efcf88edb15a402b11b8749647727	Bacteria	Proteobacteria	Gammaproteobacteria	Enterobacterales	Enterobacteriaceae	unidentified	unidentified	0.998895	3786
649cbc0a23efe5164a787b4b1b916b6a	Bacteria	Proteobacteria	Gammaproteobacteria	Pseudomonadales	Moraxellaceae	Acinetobacter	unidentified	0.999993	27
651c065d00171961ded9ca30b98fa9f5	Bacteria	Proteobacteria	Alphaproteobacteria	Acetobacterales	Acetobacteraceae	Acetobacter	unidentified	0.997869	111
66d61919e95495c15200272709a5b312	Bacteria	Proteobacteria	Gammaproteobacteria	Enterobacterales	Enterobacteriaceae	unidentified	unidentified	0.928358	747
66ec594e513eeb12d12d762be80ff37b	Bacteria	Firmicutes	Bacilli	Lactobacillales	Lactobacillaceae	Lactobacillus	unidentified	0.872119	49
670cad156b48c06136b760d1cfcc1f68	Bacteria	Firmicutes	Bacilli	Lactobacillales	Lactobacillaceae	Lactobacillus	unidentified	0.997901	314
6aba2cc704bd1396e4f021f471554f2b	Bacteria	Proteobacteria	Alphaproteobacteria	Acetobacterales	Acetobacteraceae	Acetobacter	unidentified	0.954668	232
6ae7fcce66980982dbfdb64bbbf83fa7	Bacteria	Proteobacteria	Gammaproteobacteria	Pseudomonadales	Pseudomonadaceae	Pseudomonas	unidentified	0.999928	132
6b1e29b00045049e7f662876e15f0fb3	Bacteria	Proteobacteria	Gammaproteobacteria	Pseudomonadales	Moraxellaceae	Acinetobacter	unidentified	0.950893	12
6c3d75a1a2c80854f21c402cd3ead737	Bacteria	Actinobacteriota	Actinobacteria	Micrococcales	Micrococcaceae	Rothia	Rothia endophytica	0.7538	2098
6c50dd3cf297cf30eaf754d064def0bb	Bacteria	Proteobacteria	Gammaproteobacteria	Enterobacterales	Enterobacteriaceae	Klebsiella	unidentified	0.941905	185
6c516053ebfef128935c1305ee36b418	Bacteria	Proteobacteria	Gammaproteobacteria	Enterobacterales	Enterobacteriaceae	Raoultella	unidentified	0.948565	913
6e95e3015b3a37c05c773ebf2086b101	Bacteria	Firmicutes	Bacilli	Lactobacillales	Lactobacillaceae	Lactobacillus	unidentified	0.99999	22
6eb31a2fd93424232724e109a1bf0b63	Bacteria	Proteobacteria	Gammaproteobacteria	Enterobacterales	Enterobacteriaceae	unidentified	unidentified	0.946034	8357
73eae6ea44b1d54b29800d119bcaa411	Bacteria	Firmicutes	Bacilli	Lactobacillales	Lactobacillaceae	Lactobacillus	unidentified	0.998303	60
740f7d73a6e89dc118904593ebbbfb68	Bacteria	Proteobacteria	Gammaproteobacteria	Enterobacterales	Enterobacteriaceae	unidentified	unidentified	0.96082	234
752e4dbe675717f5583e083fd4a82204	Bacteria	Proteobacteria	Gammaproteobacteria	Enterobacterales	Enterobacteriaceae	unidentified	unidentified	0.938553	56
753e87b55ced4bebf33aa76d3e3ef9d3	Bacteria	Bacteroidota	Bacteroidia	Flavobacteriales	Weeksellaceae	Chryseobacterium	unidentified	1	56
76fe98ace4224467f237a1432f71fc36	Bacteria	Proteobacteria	Gammaproteobacteria	Enterobacterales	Yersiniaceae	Serratia	unidentified	0.998814	218
77c9fed919c0de8847e3ded22ab24334	Bacteria	Firmicutes	Bacilli	Lactobacillales	Lactobacillaceae	Lactobacillus	unidentified	0.96752	15
77d59a4469b7e1e3d8adf8ba8f9aa263	Bacteria	Proteobacteria	Gammaproteobacteria	Enterobacterales	Enterobacteriaceae	unidentified	unidentified	0.819263	279
7918dda52983aef834d675758724f371	Bacteria	Firmicutes	Bacilli	Lactobacillales	Streptococcaceae	Lactococcus	unidentified	0.998032	45
7a29003cfb55d8d33b8b0718234ffe05	Bacteria	Proteobacteria	Alphaproteobacteria	Rhizobiales	Rhizobiaceae	Allorhizobium-Neorhizobium-Pararhizobium-Rhizobium	unidentified	0.996639	175
7a66ff50e1436b31d036e4345c9be1a4	Bacteria	Proteobacteria	Gammaproteobacteria	Pseudomonadales	Moraxellaceae	Acinetobacter	unidentified	1	9484
7be63287871384b424e1cb111a96e9de	Bacteria	Firmicutes	Bacilli	Lactobacillales	Lactobacillaceae	Lactobacillus	unidentified	0.999997	94
7c757603c920a4f4fb4e91b6562b3b35	Bacteria	Firmicutes	Bacilli	Lactobacillales	Lactobacillaceae	Lactobacillus	unidentified	0.999999	207
7cf4423b40a464d456889be3d59c87fd	Bacteria	Proteobacteria	Gammaproteobacteria	Pseudomonadales	Moraxellaceae	Acinetobacter	unidentified	0.996728	357
7f86ea6255e3e8b100e03a67af5f3d93	Bacteria	Proteobacteria	Gammaproteobacteria	Pseudomonadales	Moraxellaceae	Acinetobacter	Acinetobacter bereziniae	0.832751	498
8344be462d9cf7a0c6eff9f5368359f7	Bacteria	Firmicutes	Bacilli	Lactobacillales	Enterococcaceae	Enterococcus	unidentified	0.996891	635
83a3d0b729577b3ef43cb9906801a5b4	Bacteria	Bacteroidota	Bacteroidia	Flavobacteriales	Weeksellaceae	Chryseobacterium	unidentified	0.999999	684
863baabe1481f5f03d1272ce4b32bbcc	Bacteria	Firmicutes	Bacilli	Lactobacillales	Streptococcaceae	Streptococcus	unidentified	1	59
866045d107e9513a72c4437564f6865e	Bacteria	Proteobacteria	Gammaproteobacteria	Pseudomonadales	Moraxellaceae	Acinetobacter	Acinetobacter guillouiae	0.931002	1185
8686627045acc2763d7fd8cc5010a3b7	Bacteria	Proteobacteria	Gammaproteobacteria	Pseudomonadales	Moraxellaceae	Acinetobacter	unidentified	1	294
8821db9b606e9e5d807b0185b030bbe6	Bacteria	Proteobacteria	Gammaproteobacteria	Pseudomonadales	Moraxellaceae	Acinetobacter	unidentified	1	336
8cb799dc911e8b5f671d0b851650d5e7	Bacteria	Proteobacteria	Gammaproteobacteria	Enterobacterales	Enterobacteriaceae	unidentified	unidentified	0.969961	364
8ed7b233d89dde71a10275938f63faa2	Bacteria	Proteobacteria	Gammaproteobacteria	Pseudomonadales	Moraxellaceae	Acinetobacter	unidentified	1	441
8fbcba5faac3fc0eafe83133f1784101	Bacteria	Firmicutes	Bacilli	Lactobacillales	Streptococcaceae	Streptococcus	unidentified	0.984818	1420
925c9466c4e6d7c3797dd847c07a90c3	Bacteria	Firmicutes	Bacilli	Lactobacillales	Lactobacillaceae	Lactobacillus	unidentified	0.999999	25
9275f5b48066d558fd7f6b3cec30dfc5	Bacteria	Proteobacteria	Gammaproteobacteria	Pseudomonadales	Moraxellaceae	Acinetobacter	unidentified	1	141
93246c16ee4d12e08a19fe76a3fa9897	Bacteria	Proteobacteria	Gammaproteobacteria	Enterobacterales	Enterobacteriaceae	unidentified	unidentified	0.936753	1142
93654e5bf80c35b236bcc4014aec890d	Bacteria	Proteobacteria	Gammaproteobacteria	Enterobacterales	Enterobacteriaceae	Enterobacter	unidentified	0.876375	25757
937c0f87d41ca0c3ff1a58fcbdc99963	Bacteria	Proteobacteria	Gammaproteobacteria	Pseudomonadales	Moraxellaceae	Acinetobacter	unidentified	0.999994	142
939f5a82675783fee37eaedfb959b111	Bacteria	Proteobacteria	Gammaproteobacteria	Enterobacterales	Enterobacteriaceae	unidentified	unidentified	0.952076	52
9446b50ab9d8f9f66562b77e681cd178	Bacteria	Proteobacteria	Gammaproteobacteria	Pseudomonadales	Moraxellaceae	Acinetobacter	unidentified	0.999987	10
984d7e83d16cf757ab33f334dd7aa901	Bacteria	Firmicutes	Bacilli	Lactobacillales	Lactobacillaceae	Lactobacillus	Lactobacillus kefiranofaciens	0.995046	165656
989f22a719eb2bffe5f229e78816b6bb	Bacteria	Proteobacteria	Gammaproteobacteria	Enterobacterales	Enterobacteriaceae	unidentified	unidentified	0.959069	9515
994ae79dbec468abf77b99e648e03d86	Bacteria	Proteobacteria	Gammaproteobacteria	Enterobacterales	Enterobacteriaceae	unidentified	unidentified	0.989036	30
9a11f6ed96dd0227e74ef2a79da64b6f	Bacteria	Firmicutes	Bacilli	Exiguobacterales	Exiguobacteraceae	Exiguobacterium	unidentified	0.833492	16
9a20324653cb26894bfe153b3bf375c3	Bacteria	Proteobacteria	Gammaproteobacteria	Pseudomonadales	Moraxellaceae	Acinetobacter	unidentified	0.999984	21
9b740e8e047c98bb45cd4dc582c1a7f9	Bacteria	Proteobacteria	Gammaproteobacteria	Pseudomonadales	Moraxellaceae	Enhydrobacter	unidentified	0.79799	1358
9b8682a2351bfe4cbaa92b3f02191536	Bacteria	Proteobacteria	Gammaproteobacteria	Enterobacterales	Enterobacteriaceae	unidentified	unidentified	0.70909	28
9bc8cb771ed91312936a64ceed38bce0	Bacteria	Firmicutes	Bacilli	Lactobacillales	Lactobacillaceae	Lactobacillus	unidentified	0.761074	107
9df3cef82d405a0e1e6bab1c3d801d6d	Bacteria	Proteobacteria	Gammaproteobacteria	Pseudomonadales	Moraxellaceae	Acinetobacter	Acinetobacter guillouiae	0.733006	513
9e4a83b207b86e2786d525d5e3bfae50	Bacteria	Bacteroidota	Bacteroidia	Flavobacteriales	Weeksellaceae	Chryseobacterium	unidentified	0.999999	581
9f79914cb82303622866603ad7edfa54	Bacteria	Proteobacteria	Gammaproteobacteria	Enterobacterales	Enterobacteriaceae	unidentified	unidentified	0.933579	27
a0b212310100cb0f4c5765c83e313e4e	Bacteria	Firmicutes	Bacilli	Lactobacillales	Lactobacillaceae	Lactobacillus	unidentified	0.999954	134
a21463e7f09e30cd1a22ddb77596a3a7	Bacteria	Proteobacteria	Gammaproteobacteria	Pseudomonadales	Moraxellaceae	Acinetobacter	unidentified	1	2598
a74531d9781cee5c0902e1677773e44f	Bacteria	Proteobacteria	Gammaproteobacteria	Enterobacterales	Enterobacteriaceae	unidentified	unidentified	0.94051	32
aa0ab977e2df41efe1c8311d512bc1d9	Bacteria	Firmicutes	Bacilli	Lactobacillales	Streptococcaceae	Lactococcus	unidentified	1	42
aa1392d041b8983e65cb9d66068cacde	Bacteria	Proteobacteria	Gammaproteobacteria	Enterobacterales	Enterobacteriaceae	unidentified	unidentified	0.939891	133
ac2dfdbeeae94d7cf636ac578d8e3719	Bacteria	Firmicutes	Bacilli	Lactobacillales	Streptococcaceae	Lactococcus	unidentified	0.999969	41
acf36e07efcb1435fc1b639d54c24c04	Bacteria	Firmicutes	Bacilli	Lactobacillales	Lactobacillaceae	Lactobacillus	unidentified	0.999999	49
afbc365f4afa4b0020318ccb9d63ab17	Bacteria	Proteobacteria	Gammaproteobacteria	Enterobacterales	unidentified	unidentified	unidentified	0.999872	65
b0a2072f02a2b4620ca24e6b5888d247	Bacteria	Proteobacteria	Gammaproteobacteria	Enterobacterales	Enterobacteriaceae	Enterobacter	unidentified	0.878993	1383
b0b8e81b8e0a043dfb27e18febc03d69	Bacteria	Firmicutes	Bacilli	Lactobacillales	Lactobacillaceae	Lactobacillus	unidentified	0.998636	286
b0f2ed44619aff54783a95d639b13118	Bacteria	Proteobacteria	Gammaproteobacteria	Pseudomonadales	Moraxellaceae	Acinetobacter	unidentified	0.999993	98
b281a7341c489cbb29b279c289178a00	Bacteria	Firmicutes	Bacilli	Staphylococcales	Staphylococcaceae	Macrococcus	unidentified	0.999942	142
b5173cff8f7f461c36b520b48a44f6e2	Bacteria	Proteobacteria	Gammaproteobacteria	Aeromonadales	Aeromonadaceae	Aeromonas	unidentified	0.962978	58
b7514635c9ecae45b9e28c022204a077	Bacteria	Proteobacteria	Gammaproteobacteria	unidentified	unidentified	unidentified	unidentified	0.999983	170
b900f275c0c41a3de9604ca46b159d82	Bacteria	Firmicutes	Bacilli	Lactobacillales	Lactobacillaceae	Lactobacillus	unidentified	0.999992	30
baf03a847e580e6a97272b8d94c57f75	Bacteria	Firmicutes	Bacilli	Lactobacillales	Lactobacillaceae	Lactobacillus	Lactobacillus helveticus	0.792956	1856269
bafc9dfd734107669cbd69480782b938	Bacteria	Bacteroidota	Bacteroidia	Flavobacteriales	Weeksellaceae	Chryseobacterium	unidentified	0.930381	16
c00e7c6c32d4f172392b65f9f400cacd	Bacteria	Firmicutes	Bacilli	Lactobacillales	Streptococcaceae	Lactococcus	Lactococcus raffinolactis	0.967442	2673
c0b62791a9265d8efc15188b89e8bf3f	Bacteria	Firmicutes	Bacilli	Lactobacillales	Lactobacillaceae	Lactobacillus	unidentified	0.998363	35
c32db257d4e3106a3f2940437567d49e	Bacteria	Firmicutes	Bacilli	Lactobacillales	Lactobacillaceae	Lactobacillus	unidentified	1	18754
c3ac5b191c508ac3fe54b7b361ab201f	Bacteria	Firmicutes	Bacilli	Lactobacillales	unidentified	unidentified	unidentified	0.999985	153
c3f6276883c10b9897fbacf9baf37c71	Bacteria	Proteobacteria	Gammaproteobacteria	Pseudomonadales	Pseudomonadaceae	Pseudomonas	unidentified	0.999994	199
c3f7ca07e7809a37d29de3882c8b072e	Bacteria	Proteobacteria	Gammaproteobacteria	Enterobacterales	Enterobacteriaceae	unidentified	unidentified	0.998082	1683
c50caa282c30ea14b39774e2d50ac633	Bacteria	Proteobacteria	Gammaproteobacteria	Enterobacterales	Enterobacteriaceae	Enterobacter	unidentified	0.747048	84361
c5c200356c53f3783d634aa0406cf3e9	Bacteria	Firmicutes	Bacilli	Lactobacillales	Streptococcaceae	Lactococcus	Lactococcus lactis	0.88795	27853
c6cdc71a1f7376db5a843ade152ed641	Bacteria	Firmicutes	Bacilli	Lactobacillales	Enterococcaceae	Enterococcus	unidentified	0.999869	81
c7947e215365c92220b530b6c89dd888	Bacteria	Proteobacteria	Gammaproteobacteria	Burkholderiales	Chromobacteriaceae	Vogesella	unidentified	1	57
c7dd9f215414791daee74e1cb5acc021	Bacteria	Proteobacteria	Gammaproteobacteria	Enterobacterales	Yersiniaceae	Serratia	unidentified	0.952258	731
c9e15ba51eb6661a10cfa7e79355822e	Bacteria	Proteobacteria	Gammaproteobacteria	Pseudomonadales	Moraxellaceae	Acinetobacter	unidentified	0.998783	378
cb208210f18941cffc6676b46fb30345	Bacteria	Proteobacteria	Gammaproteobacteria	Enterobacterales	Enterobacteriaceae	Enterobacter	unidentified	0.72822	82
cbf1d9cccfac2576101e7a02f5a0b0cd	Bacteria	Proteobacteria	Gammaproteobacteria	Xanthomonadales	Xanthomonadaceae	Stenotrophomonas	unidentified	1	180
cbfa67a47f561ee1aae876b89d717ba6	Bacteria	Proteobacteria	Gammaproteobacteria	Enterobacterales	Enterobacteriaceae	unidentified	unidentified	0.95422	308
cd2bc1b630d0354722df21abdb3e4815	Bacteria	Proteobacteria	Gammaproteobacteria	Aeromonadales	Aeromonadaceae	Aeromonas	unidentified	0.999531	1138
cda71773e048eb33e1fcb3458f0d84a7	Bacteria	Proteobacteria	Gammaproteobacteria	Pseudomonadales	Moraxellaceae	Acinetobacter	unidentified	1	6763
ce352977188bd70fb10ba35fd7c41c5a	Bacteria	Proteobacteria	Gammaproteobacteria	Pseudomonadales	Moraxellaceae	Acinetobacter	unidentified	1	3007
cf59ba99d746551033f2c40b8bf898f4	Bacteria	Proteobacteria	Gammaproteobacteria	Pseudomonadales	Moraxellaceae	Acinetobacter	unidentified	1	483
d0dff253fcf1c85884a625c8cfcaf850	Bacteria	Proteobacteria	Gammaproteobacteria	Enterobacterales	Yersiniaceae	Serratia	unidentified	0.940529	132
d161c4d11ce354a777a5a7bb67643af8	Bacteria	Proteobacteria	Gammaproteobacteria	Enterobacterales	Enterobacteriaceae	unidentified	unidentified	0.945139	75
d1a24fd7f12ac5dd5f767a56cfdd46cd	Bacteria	Proteobacteria	Gammaproteobacteria	Pseudomonadales	Moraxellaceae	Acinetobacter	unidentified	1	2475
d31d1843176dc4a91eb2007fab670faa	Bacteria	Firmicutes	Bacilli	Lactobacillales	Lactobacillaceae	Lactobacillus	unidentified	0.999996	632
d384882c98103e9fc0a05947018e6089	Bacteria	Firmicutes	Bacilli	Lactobacillales	Lactobacillaceae	Lactobacillus	Lactobacillus kefiranofaciens	0.797479	206
d4da6685892b8a3eed06ec63a629cd0b	Bacteria	Proteobacteria	Gammaproteobacteria	Enterobacterales	Enterobacteriaceae	unidentified	unidentified	0.996511	114
d8a08e8290a8c8eb32afa01678526a5e	Bacteria	Proteobacteria	Gammaproteobacteria	Xanthomonadales	Xanthomonadaceae	Stenotrophomonas	unidentified	0.999999	60
da2cd4297970ec223fba3c220cb49c20	Bacteria	Proteobacteria	Gammaproteobacteria	Enterobacterales	Enterobacteriaceae	unidentified	unidentified	0.994384	1401
daa11f6a7ecfa006d9cbd80fa603df52	Bacteria	Proteobacteria	Gammaproteobacteria	Pseudomonadales	Moraxellaceae	Acinetobacter	unidentified	0.999988	14
dc82ef5d3e8b8d1170d28aa57ebb3de7	Bacteria	Firmicutes	Bacilli	Staphylococcales	Staphylococcaceae	Macrococcus	unidentified	0.999675	10
df1540c78c66cca6b72c8c3c45c348be	Bacteria	Firmicutes	Bacilli	Lactobacillales	Lactobacillaceae	Lactobacillus	Lactobacillus hamsteri	0.783559	152
dfc46ef8f7e93efd1af4f3d08c2da106	Bacteria	Proteobacteria	Alphaproteobacteria	Acetobacterales	Acetobacteraceae	Acetobacter	unidentified	0.95458	40
e051f866f1ac02090d70e0644db9f558	Bacteria	Proteobacteria	Gammaproteobacteria	Pseudomonadales	Moraxellaceae	Acinetobacter	unidentified	1	267
e1481236cfd7f904a27a92e7ee8aef30	Bacteria	Proteobacteria	Gammaproteobacteria	Enterobacterales	Enterobacteriaceae	Enterobacter	unidentified	0.911939	296
e1ec4d68d0996595b4574bf1dac28c46	Bacteria	Bacteroidota	Bacteroidia	Flavobacteriales	Weeksellaceae	Chryseobacterium	unidentified	0.999545	102
e345ced11305205cae8445bf92037f8d	Bacteria	Proteobacteria	Alphaproteobacteria	Acetobacterales	Acetobacteraceae	Acetobacter	unidentified	0.998364	451
e47c7b7c57d618f60e79647b084b7871	Bacteria	Proteobacteria	Gammaproteobacteria	Enterobacterales	Enterobacteriaceae	unidentified	unidentified	0.932073	99
e53116cefea38e453a9ac1f55e81d009	Bacteria	Firmicutes	Bacilli	Lactobacillales	Lactobacillaceae	Lactobacillus	unidentified	0.898179	20
e8142ad3826c7665303f9e0c90e0f9ca	Bacteria	Firmicutes	Bacilli	Lactobacillales	Lactobacillaceae	Lactobacillus	unidentified	0.99731	276
e86f62c96f34ecf05ae8036e0c251050	Bacteria	Firmicutes	Bacilli	Lactobacillales	Lactobacillaceae	Lactobacillus	unidentified	0.999999	39
e8e714b2323d7d4facb67cdf440970ea	Bacteria	Proteobacteria	Gammaproteobacteria	Pseudomonadales	Moraxellaceae	Acinetobacter	Acinetobacter guillouiae	0.870171	555
e9199601eb3337b54a4025694e5197a0	Bacteria	Firmicutes	Bacilli	Lactobacillales	Streptococcaceae	Lactococcus	unidentified	0.998368	192
e9f99ca3c10b0ed54172d740e8e39f98	Bacteria	Proteobacteria	Gammaproteobacteria	Enterobacterales	Enterobacteriaceae	unidentified	unidentified	0.997636	7877
eaa57f77edaae985a5784f41ece4ce33	Bacteria	Firmicutes	Bacilli	Lactobacillales	Streptococcaceae	Lactococcus	Lactococcus garvieae	0.987127	6061
eab4018b7981650de3f96835d1147af2	Bacteria	Firmicutes	Bacilli	Lactobacillales	Lactobacillaceae	Lactobacillus	unidentified	0.958032	63
ebe1ba548dc7447b11a11a7d6087a667	Bacteria	Proteobacteria	Gammaproteobacteria	Enterobacterales	Enterobacteriaceae	Enterobacter	unidentified	0.88807	255220
ec66cc508688c21839c3367bce612ae4	Bacteria	Proteobacteria	Gammaproteobacteria	Enterobacterales	Enterobacteriaceae	Enterobacter	unidentified	0.741444	100402
edc8a38c7681b7af696000c590b7dd46	Bacteria	Proteobacteria	Gammaproteobacteria	Burkholderiales	Comamonadaceae	unidentified	unidentified	1	28
f0dc442036122227add19b59bd309512	Bacteria	Proteobacteria	Gammaproteobacteria	Enterobacterales	Enterobacteriaceae	Enterobacter	unidentified	0.857061	138
f0de5147011ad6a5cf0884871768d651	Bacteria	Proteobacteria	Gammaproteobacteria	Enterobacterales	Enterobacteriaceae	unidentified	unidentified	0.979132	177
f103900c85632179329dbbcaf4598124	Bacteria	Proteobacteria	Gammaproteobacteria	Enterobacterales	Enterobacteriaceae	unidentified	unidentified	0.93645	149
f23982138e4d5ed3fcb068cbac95af41	Bacteria	Proteobacteria	Gammaproteobacteria	Pseudomonadales	Moraxellaceae	Acinetobacter	unidentified	1	5323
f29ce7642b545d1bd74f9f1f02d30917	Bacteria	Proteobacteria	Gammaproteobacteria	Burkholderiales	Comamonadaceae	Comamonas	Comamonas testosteroni	0.838095	75
f3b11de1a7ceabf9107a7f9814f8bc39	Bacteria	Proteobacteria	Gammaproteobacteria	Pseudomonadales	Moraxellaceae	Acinetobacter	unidentified	0.999993	230
f4f21bffe1744f5899e2d1ca27bea240	Bacteria	Proteobacteria	Gammaproteobacteria	Enterobacterales	Enterobacteriaceae	unidentified	unidentified	0.99715	32
f5efaab4944dca6092be8006004d7397	Bacteria	Proteobacteria	Gammaproteobacteria	Enterobacterales	Enterobacteriaceae	unidentified	unidentified	0.977877	14694
f8d9649c88f0a9099452de64199fe36b	Bacteria	Proteobacteria	Gammaproteobacteria	Enterobacterales	Enterobacteriaceae	unidentified	unidentified	0.994568	2110
fa3d4902731d1aa6bef539e5172dbaae	Bacteria	Proteobacteria	Gammaproteobacteria	Pseudomonadales	Moraxellaceae	Acinetobacter	Acinetobacter guillouiae	0.827479	189
fa6fd76eba9176c140e7a00dc6b83e39	Bacteria	Proteobacteria	Alphaproteobacteria	Acetobacterales	Acetobacteraceae	Acetobacter	unidentified	0.999707	30220
fa87b2149a0ff7c19b26a2e83e3ce54d	Bacteria	Firmicutes	Bacilli	Lactobacillales	Lactobacillaceae	Lactobacillus	unidentified	0.733906	28
fb23e1c84ed1d4b4474bdbea80280af5	Bacteria	Proteobacteria	Gammaproteobacteria	Enterobacterales	Enterobacteriaceae	unidentified	unidentified	0.972614	384
fbd1f4de49061f3f7db6443687bfec2e	Bacteria	Proteobacteria	Gammaproteobacteria	Enterobacterales	Yersiniaceae	Serratia	unidentified	0.979241	237
fd372f48d37f1e678b155abd79ad6182	Bacteria	Proteobacteria	Gammaproteobacteria	Enterobacterales	Enterobacteriaceae	unidentified	unidentified	0.913458	18
fd5eca9c5152ccabc8e097accf2a201a	Bacteria	Firmicutes	Bacilli	Lactobacillales	Streptococcaceae	Lactococcus	unidentified	0.999999	27

## Sheet: Table S2
Table S2 Taxonomy of fungal ASVs and corresponding reads.
ASVs	kingdom	phylum	class	order	family	genus	species	confidence	reads
00f963fc20e3fa9b6c88941a2272c935	Fungi	Ascomycota	Saccharomycetes	Saccharomycetales	Saccharomycetales	Candida	Candida parapsilosis	0.830998	33
030959bbaf4b498a95addda52a9fe80b	Fungi	Ascomycota	Dothideomycetes	Capnodiales	Cladosporiaceae	Cladosporium	Cladosporium sphaerospermum	0.979995	1406
03c064a1e3b9fae490312223c25d791b	Fungi	Ascomycota	Saccharomycetes	Saccharomycetales	Saccharomycetaceae	Kluyveromyces	Kluyveromyces lactis	0.997502	1654
040af1cb79b9adc6d0a15c2738cbc89b	Fungi	Basidiomycota	Tremellomycetes	Trichosporonales	Trichosporonaceae	Trichosporon	Trichosporon ovoides	0.906015	47803
042e0fa06015922505d04a2f16fb17f1	Fungi	Ascomycota	Saccharomycetes	Saccharomycetales	Phaffomycetaceae	Wickerhamomyces	Wickerhamomyces anomalus	1	432
0947da85aa6b180595fd69eeadbccf98	Fungi	Ascomycota	Saccharomycetes	Saccharomycetales	Saccharomycetaceae	Kluyveromyces	Kluyveromyces marxianus	0.999813	574
0a60a59a59c2d94ee27ece098ad77e0d	Fungi	Ascomycota	Saccharomycetes	Saccharomycetales	Debaryomycetaceae	Millerozyma	Millerozyma farinosa	0.945376	63
0b10786fdbbff961d35f8e2e6da05a51	Fungi	Ascomycota	Dothideomycetes	Capnodiales	Cladosporiaceae	Cladosporium	Cladosporium cladosporioides	0.886957	616
0b6157fee66672a3f7455575066e07c2	Fungi	Basidiomycota	Tremellomycetes	Cystofilobasidiales	Mrakiaceae	Tausonia	Tausonia pullulans	1	577
0cbf889d59881cc37236e62404a76e92	Fungi	Ascomycota	Saccharomycetes	Saccharomycetales	Pichiaceae	Brettanomyces	Brettanomyces anomalus	1	1764
0fe5a245d8be476c4e09a319611d4e61	Fungi	Ascomycota	Saccharomycetes	Saccharomycetales	Pichiaceae	Brettanomyces	Brettanomyces anomalus	1	158
11672bd35f734e8d9f9adfba5364acc5	Fungi	Ascomycota	Saccharomycetes	Saccharomycetales	Saccharomycetaceae	Kazachstania	Kazachstania unispora	0.989158	766516
1216f2071937c1bfb3c9cd8f3e9152b1	Fungi	Basidiomycota	Tremellomycetes	Trichosporonales	Trichosporonaceae	Trichosporon	unidentified	1	993
131b2671e599e192b6c1c590c59b9b95	Fungi	Ascomycota	Saccharomycetes	Saccharomycetales	Saccharomycetales	Candida	unidentified	0.999988	204
13ce2dbb03154d6006e4f7ba55815482	Fungi	Basidiomycota	Tremellomycetes	Cystofilobasidiales	Mrakiaceae	Tausonia	Tausonia pullulans	1	6015
16c5ddd491c326522bc330ad263be030	Fungi	Basidiomycota	Tremellomycetes	Trichosporonales	Trichosporonaceae	Apiotrichum	Apiotrichum xylopini	0.744882	186
16ee1b5268ab4db289fb6a39f7821df2	Fungi	Basidiomycota	Microbotryomycetes	Sporidiobolales	Sporidiobolaceae	Rhodotorula	Rhodotorula mucilaginosa	1	1192
1741e51bb26c510f1405ed2b8d3403ab	Fungi	Ascomycota	Sordariomycetes	Sordariales	Sordariaceae	unidentified	unidentified	0.999999	119
1815af81aeac16b40e7defedf30fbdbe	Fungi	Basidiomycota	Tremellomycetes	Tremellales	Rhynchogastremataceae	Papiliotrema	Papiliotrema laurentii	0.999997	907
19f5ab24823728694c63eeca52966459	Fungi	Ascomycota	Dothideomycetes	Capnodiales	Cladosporiaceae	Cladosporium	Cladosporium sphaerospermum	0.969749	1154
1bdef117d3864208d997e721af7920ee	Fungi	Basidiomycota	Malasseziomycetes	Malasseziales	Malasseziaceae	Malassezia	Malassezia equina	1	282
1fd4c365ed3e077904ed3e0d69695924	Fungi	Ascomycota	Saccharomycetes	Saccharomycetales	Pichiaceae	Brettanomyces	Brettanomyces anomalus	1	2284
208853d4378bfc45be9844d602526b3c	Fungi	Ascomycota	Sordariomycetes	Hypocreales	Cordycipitaceae	Engyodontium	Engyodontium album	0.962009	120
209559c67f17fc7e2d8cd48d42d12c0a	Fungi	Ascomycota	Saccharomycetes	Saccharomycetales	Saccharomycetales	Candida	Candida zeylanoides	0.979062	16417
244d331f3bb9879955582a98c19c5fb3	Fungi	Basidiomycota	Tremellomycetes	Tremellales	Bulleribasidiaceae	Vishniacozyma	Vishniacozyma victoriae	0.999962	378
25c553c191d4918d893940f283e19e98	Fungi	Basidiomycota	Tremellomycetes	Tremellales	Tremellaceae	Tremella	Tremella fuciformis	0.991175	936
2997d5360b21fcb3000d0a2278a77e55	Fungi	Basidiomycota	Tremellomycetes	Trichosporonales	Trichosporonaceae	Trichosporon	Trichosporon ovoides	0.929882	17766
2a20cace88c5539a65ef68b02a71d613	Fungi	Basidiomycota	Tremellomycetes	Trichosporonales	Trichosporonaceae	Trichosporon	Trichosporon asahii	0.981493	35183
2ae139c436fce1b03b843f88fbdc29d7	Fungi	Basidiomycota	Tremellomycetes	Trichosporonales	Trichosporonaceae	Trichosporon	unidentified	1	869
2ba2f959526601b979ad600450964366	Fungi	Ascomycota	Saccharomycetes	Saccharomycetales	Phaffomycetaceae	Wickerhamomyces	Wickerhamomyces anomalus	1	158
2f44927e235cc4f0604fd9b9959317f1	Fungi	Basidiomycota	Tremellomycetes	Cystofilobasidiales	Mrakiaceae	Tausonia	Tausonia pullulans	1	979
30861a2dc038c5a94567a8d284356865	Fungi	Ascomycota	Dothideomycetes	Pleosporales	Pleosporales	unidentified	unidentified	0.962399	114
366dea428c48dd73d5cada92f03ec8e0	Fungi	Ascomycota	Saccharomycetes	Saccharomycetales	Saccharomycetaceae	Kluyveromyces	Kluyveromyces marxianus	0.999812	5898
369c19df1377aca3178c40f270473dac	Fungi	Ascomycota	Saccharomycetes	Saccharomycetales	Saccharomycetales	Candida	Candida parapsilosis	0.803098	136
3af2ac1dba2f88b453c45a1686596aa2	Fungi	Ascomycota	Saccharomycetes	Saccharomycetales	Pichiaceae	Brettanomyces	Brettanomyces bruxellensis	0.983901	2620
3c2e307cd38db42503b9d4c9f631eadb	Fungi	Ascomycota	Sordariomycetes	Hypocreales	Nectriaceae	Fusarium	Fusarium lacertarum	0.971503	138
3ca12b4b862f4b2deb6499ed4be1a2d2	Fungi	Ascomycota	Dothideomycetes	Pleosporales	Phaeosphaeriaceae	Paraphoma	Paraphoma fimeti	0.999527	75
3d7e9834b552fae775c185c3403bca37	Fungi	Ascomycota	Saccharomycetes	Saccharomycetales	Debaryomycetaceae	Debaryomyces	Debaryomyces prosopidis	0.997486	7566
3f74a0cbf90cb77a1d8027f2bb96f2c3	Fungi	Ascomycota	Saccharomycetes	Saccharomycetales	Saccharomycetaceae	Kluyveromyces	Kluyveromyces marxianus	0.999858	582
4047e0c657ee8ba00e0d017c85c3aff4	Fungi	Ascomycota	Saccharomycetes	Saccharomycetales	Debaryomycetaceae	Debaryomyces	Debaryomyces prosopidis	0.998012	1030
4053d563ab8f8e3d309b3c591dbfe7ab	Fungi	Ascomycota	Saccharomycetes	Saccharomycetales	Saccharomycetales	Candida	Candida parapsilosis	0.724229	106
4184318379d232498a7223d1bf4ea473	Fungi	Basidiomycota	Tremellomycetes	Cystofilobasidiales	Mrakiaceae	Tausonia	Tausonia pullulans	1	149
428fc5994fe44d6718f63a162271ad73	Fungi	Basidiomycota	Tremellomycetes	Filobasidiales	Filobasidiaceae	Naganishia	unidentified	0.999998	920
46bbb7e44cca766089d3f8ec01942751	Fungi	Ascomycota	Dothideomycetes	Pleosporales	Didymellaceae	unidentified	unidentified	0.994636	711
46dcc07cf0660969d008238d7faf316b	Fungi	Ascomycota	Saccharomycetes	Saccharomycetales	Saccharomycetaceae	Kazachstania	Kazachstania unispora	0.920264	750
474c7dde9f74b9205acd8c765552c172	Fungi	Ascomycota	Saccharomycetes	Saccharomycetales	Saccharomycetales	Candida	Candida parapsilosis	0.778122	129
47557373f24a22177bb1f48b7a6cccf4	Fungi	Basidiomycota	Tremellomycetes	Tremellales	Tremellaceae	Cryptococcus	Cryptococcus uniguttulatus	1	25
4764b6e45391221f5df39955ac1c5f14	Fungi	Ascomycota	Saccharomycetes	Saccharomycetales	Pichiaceae	Brettanomyces	Brettanomyces bruxellensis	0.988556	18102
4997ed316ce136e8ebc47ed203332aa6	Fungi	Basidiomycota	Tremellomycetes	Trichosporonales	Trichosporonaceae	Trichosporon	Trichosporon asahii	0.980544	7331
4c8acecb0dc1ed81baacc409748c4426	Fungi	Basidiomycota	Malasseziomycetes	Malasseziales	Malasseziaceae	Malassezia	Malassezia equina	1	292
4ccbfed475b8943943d2dea86f81aaef	Fungi	Basidiomycota	Malasseziomycetes	Malasseziales	Malasseziaceae	Malassezia	Malassezia equina	1	1254
4d1a06179016a124baa4c8b313b120ec	Fungi	Ascomycota	Saccharomycetes	Saccharomycetales	Debaryomycetaceae	Hyphopichia	Hyphopichia burtonii	1	117
4e5a959dc1622fed5352cb8d60fd5f64	Fungi	Basidiomycota	Tremellomycetes	Filobasidiales	Filobasidiaceae	Naganishia	Naganishia albida	0.984267	74
4fe7d37910fd47f51a7fbe9c7efad6a8	Fungi	Ascomycota	Dothideomycetes	Mytilinidales	Gloniaceae	Cenococcum	Cenococcum geophilum	0.776902	126
509dee093e86604a154df32cee334024	Fungi	Ascomycota	Saccharomycetes	Saccharomycetales	Saccharomycetaceae	Kluyveromyces	Kluyveromyces marxianus	0.99981	233
52a8b88a0dc9e17cc2a872ff67b15398	Fungi	Basidiomycota	Microbotryomycetes	Sporidiobolales	Sporidiobolaceae	Rhodotorula	Rhodotorula mucilaginosa	0.999994	330
53e7aadbc3818eb1ae57b9cc686b0722	Fungi	Ascomycota	Dothideomycetes	Capnodiales	Cladosporiaceae	Cladosporium	Cladosporium cladosporioides	0.871848	2064
54fe87dd31d2a87d54a0ec8c8ca9120d	Fungi	Ascomycota	Saccharomycetes	Saccharomycetales	Saccharomycetales	Candida	Candida parapsilosis	0.81566	90
567a08c9a338fb56d3fdb81ed86273d0	Fungi	Ascomycota	Saccharomycetes	Saccharomycetales	Saccharomycetaceae	Saccharomyces	Saccharomyces cerevisiae	0.860777	65
5c7630b360ae3252e6a2ad03386a8b86	Fungi	Basidiomycota	Tremellomycetes	Trichosporonales	Trichosporonaceae	Trichosporon	Trichosporon ovoides	0.929642	22995
5cf09207304647b4ca2bcab84e8eecc9	Fungi	Basidiomycota	Tremellomycetes	Cystofilobasidiales	Mrakiaceae	Mrakia	Mrakia frigida	0.99998	124
5ea0013cce87286d7a4b1b89710927ea	Fungi	Ascomycota	Saccharomycetes	Saccharomycetales	Saccharomycetaceae	Kazachstania	Kazachstania unispora	0.986457	1998
60fc88862c620edb16f80a3388545c74	Fungi	Ascomycota	Saccharomycetes	Saccharomycetales	Saccharomycopsidaceae	Saccharomycopsis	Saccharomycopsis fibuligera	1	393
611b635c8a4abd1804d256956db4b5df	Fungi	Basidiomycota	Tremellomycetes	Trichosporonales	Trichosporonaceae	Cutaneotrichosporon	Cutaneotrichosporon curvatus	0.999292	2796
63063a9ce2f28faa3b47745414eda91c	Fungi	Ascomycota	Saccharomycetes	Saccharomycetales	Debaryomycetaceae	Debaryomyces	Debaryomyces prosopidis	0.997816	1694
634ba1ea05039c30ad7eae046f6ff4e7	Fungi	Basidiomycota	Microbotryomycetes	Sporidiobolales	Sporidiobolaceae	Rhodotorula	Rhodotorula mucilaginosa	1	10008
636cec7b5119058a92387712cf1f259c	Fungi	Ascomycota	Saccharomycetes	Saccharomycetales	Saccharomycetales	Candida	Candida parapsilosis	0.826012	114
63acd67ccd2b856cfb65771bf52a7e17	Fungi	Ascomycota	Saccharomycetes	Saccharomycetales	Pichiaceae	Brettanomyces	Brettanomyces bruxellensis	0.989233	169
63ec5c53e85dee3d1a4de6653df1aa0b	Fungi	Basidiomycota	Microbotryomycetes	Sporidiobolales	Sporidiobolaceae	Rhodotorula	Rhodotorula mucilaginosa	1	1573
661438a67ebfb26bf3f83e1f285e6d7e	Fungi	Ascomycota	Saccharomycetes	Saccharomycetales	Saccharomycetaceae	Kazachstania	Kazachstania unispora	0.989944	47
66aba47d44f3f9029ed236c73e035169	Fungi	Basidiomycota	Tremellomycetes	Trichosporonales	Trichosporonaceae	Trichosporon	Trichosporon ovoides	0.906328	1416
6c4abb091c50adb86f6075b2551634f5	Fungi	Ascomycota	Saccharomycetes	Saccharomycetales	Saccharomycetales	Candida	Candida zeylanoides	0.979725	25849
6d75f22e9eabccde576ce203554ab926	Fungi	Basidiomycota	Tremellomycetes	Filobasidiales	Filobasidiaceae	Filobasidium	unidentified	0.999998	97
6ddf274bb92730523eab15bba9f05094	Fungi	Ascomycota	Saccharomycetes	Saccharomycetales	Phaffomycetaceae	Wickerhamomyces	Wickerhamomyces anomalus	1	370
6f46329a23c466bcbe1ddd3d6d9330b8	Fungi	Ascomycota	Saccharomycetes	Saccharomycetales	Saccharomycetaceae	Kluyveromyces	Kluyveromyces marxianus	0.999752	9265
71e23e926a8b3de9c950cf11957a681b	Fungi	Ascomycota	Saccharomycetes	Saccharomycetales	Saccharomycetales	Candida	Candida zeylanoides	0.983798	203
7221c8f902c8f60fb3dd01a096e51d61	Fungi	Basidiomycota	Tremellomycetes	Trichosporonales	Trichosporonaceae	Trichosporon	unidentified	1	14533
734868a6c22690bea7e39a68831058cc	Fungi	Ascomycota	Sordariomycetes	Microascales	Microascaceae	Scopulariopsis	Scopulariopsis candida	0.960544	73
739a574c74f4b74fdfc362d235cf9190	Fungi	Ascomycota	Saccharomycetes	Saccharomycetales	Saccharomycetaceae	Kluyveromyces	Kluyveromyces lactis	0.998733	2250
760cc744ca540eea5ce10a69f3e868e3	Fungi	Ascomycota	Sordariomycetes	Microascales	Microascaceae	Kernia	Kernia geniculotricha	0.999984	141
76293e15e75446c1e260856fab65c220	Fungi	Ascomycota	Saccharomycetes	Saccharomycetales	Saccharomycopsidaceae	Saccharomycopsis	Saccharomycopsis fibuligera	1	2501
77b4aeffef2d8fac0be1e16cc51fece3	Fungi	Ascomycota	Dothideomycetes	Dothideales	Aureobasidiaceae	Aureobasidium	Aureobasidium pullulans	0.982281	894
79378f186fdd24a5734ba437840167ab	Fungi	Basidiomycota	Tremellomycetes	Cystofilobasidiales	Mrakiaceae	Mrakia	Mrakia frigida	0.999976	68
795a6d099dd76e565587ff0bdb138deb	Fungi	Ascomycota	Saccharomycetes	Saccharomycetales	Saccharomycetaceae	Torulaspora	Torulaspora delbrueckii	0.980821	3438
7b8c4d35243502616ea76cecf9a25057	Fungi	Ascomycota	Saccharomycetes	Saccharomycetales	Pichiaceae	Brettanomyces	Brettanomyces anomalus	1	288
7e4ead8e27c14945bfa4691c6d251b2b	Fungi	Basidiomycota	Tremellomycetes	Cystofilobasidiales	Mrakiaceae	Mrakia	Mrakia frigida	0.999978	606
7efec348c7cdcf6eeb9fa652eb05b7dd	Fungi	Ascomycota	Saccharomycetes	Saccharomycetales	Saccharomycetaceae	Saccharomyces	Saccharomyces cerevisiae	0.860767	61
7f7557ba4c646fa209f63131b847df10	Fungi	Basidiomycota	Tremellomycetes	Trichosporonales	Trichosporonaceae	Trichosporon	unidentified	1	2303
7fef66745a22f8e5e9d885177828b003	Fungi	Basidiomycota	Agaricomycetes	Phallales	Phallaceae	Phallus	Phallus hadriani	1	452
810f59e1ee619f8ab84294a76037261d	Fungi	Basidiomycota	Tremellomycetes	Trichosporonales	Trichosporonaceae	Cutaneotrichosporon	Cutaneotrichosporon curvatus	0.999346	149
8187a4a3a016d4c84f11b06bbd8085f0	Fungi	Basidiomycota	Tremellomycetes	Trichosporonales	Trichosporonaceae	Trichosporon	Trichosporon ovoides	0.90172	3052
8418f2c5d54ed9bb059efa7318bd1ffb	Fungi	Ascomycota	Saccharomycetes	Saccharomycetales	Saccharomycetales	Candida	unidentified	0.999989	168
84844a1658fad0cff2527dcde11f4050	Fungi	Ascomycota	Dothideomycetes	Capnodiales	Cladosporiaceae	Cladosporium	Cladosporium sphaerospermum	0.974746	178
8671233e2ce3756dfff5eecc63e7a322	Fungi	Ascomycota	Dothideomycetes	Capnodiales	Cladosporiaceae	Cladosporium	Cladosporium cladosporioides	0.781347	198
8b3f9b1aada4877e31795b36b6bea42c	Fungi	Basidiomycota	Tremellomycetes	Filobasidiales	Filobasidiaceae	Naganishia	unidentified	0.999999	132
8d79bf8b31e5737befa59adf13262f3c	Fungi	Ascomycota	Saccharomycetes	Saccharomycetales	Debaryomycetaceae	Debaryomyces	Debaryomyces prosopidis	0.99793	1299
8daa1d2b6d47e000b3f5ee4b2d85b7be	Fungi	Ascomycota	Saccharomycetes	Saccharomycetales	Saccharomycopsidaceae	Saccharomycopsis	Saccharomycopsis fibuligera	1	494
8f83183a6fc961db322fb92cb3bfa136	Fungi	Ascomycota	Leotiomycetes	Thelebolales	Thelebolaceae	Thelebolus	Thelebolus globosus	0.999997	309
907d6ea81cca5ff4001ff1429ba8e7bf	Fungi	Basidiomycota	Tremellomycetes	Trichosporonales	Trichosporonaceae	Trichosporon	Trichosporon ovoides	0.900868	968
91666a5f7f24e2407bfb72e5fd81796b	Fungi	Ascomycota	Dothideomycetes	Dothideales	Aureobasidiaceae	Aureobasidium	Aureobasidium pullulans	0.974477	127
920c13bc69de973acb9d6240bb089508	Fungi	Ascomycota	Saccharomycetes	Saccharomycetales	Saccharomycetaceae	Kluyveromyces	Kluyveromyces marxianus	0.999881	802
92bb1022bb4d73f0d85b9622572795ec	Fungi	Ascomycota	Saccharomycetes	Saccharomycetales	Saccharomycetaceae	Torulaspora	Torulaspora delbrueckii	0.973635	4113
95a3df4b8b6a302aafc37ca2a34dcad1	Fungi	Ascomycota	Saccharomycetes	Saccharomycetales	Saccharomycetaceae	Kazachstania	Kazachstania unispora	0.98916	748250
965e7d4172e61bfd704d3581c125335d	Fungi	Ascomycota	Saccharomycetes	Saccharomycetales	Saccharomycetales	Candida	Candida parapsilosis	0.815744	36
977cddad93f2b4602acbc697e131c402	Fungi	Basidiomycota	Tremellomycetes	Trichosporonales	Trichosporonaceae	Trichosporon	Trichosporon asahii	0.980113	4129
97bfe3502a47e71728b016a1f4544deb	Fungi	Ascomycota	Saccharomycetes	Saccharomycetales	Phaffomycetaceae	Wickerhamomyces	Wickerhamomyces anomalus	1	2430
980dc7f33c00a735aa485b351db26e52	Fungi	Basidiomycota	Tremellomycetes	Filobasidiales	Filobasidiaceae	Filobasidium	Filobasidium wieringae	1	27
99860f6f428ff9c55d55f1affbe96aaa	Fungi	Ascomycota	Saccharomycetes	Saccharomycetales	Saccharomycetaceae	Torulaspora	Torulaspora delbrueckii	0.975794	8439
9a1e8e480c0b0676297cf189eb78eb2d	Fungi	Ascomycota	Saccharomycetes	Saccharomycetales	Saccharomycetaceae	Kazachstania	Kazachstania unispora	0.826748	267
9b360bdb7f9c6d3d34eb9238ac611636	Fungi	Ascomycota	Saccharomycetes	Saccharomycetales	Saccharomycetales	Candida	Candida zeylanoides	0.979408	110025
9c3525285dff9d23090f93e84dc6904b	Fungi	Ascomycota	Dothideomycetes	Pleosporales	Pleosporaceae	Alternaria	Alternaria alternata	0.76296	53
9e09451e63f739bbb4efc9a94c7aade2	Fungi	Basidiomycota	Tremellomycetes	Trichosporonales	Trichosporonaceae	Trichosporon	Trichosporon ovoides	0.911202	15400
9ea2cd2d498d3fc4f586a2196122d4fe	Fungi	Basidiomycota	Tremellomycetes	Cystofilobasidiales	Mrakiaceae	Mrakia	Mrakia frigida	0.999173	369
9eec65ab1e53bee59509c95879c5aa38	Fungi	Ascomycota	Saccharomycetes	Saccharomycetales	Saccharomycetaceae	Kazachstania	Kazachstania unispora	0.992264	405
9f56af9e59954b39fa8b3f12fb7690d7	Fungi	Ascomycota	Eurotiomycetes	Eurotiales	Aspergillaceae	Penicillium	Penicillium expansum	0.910374	33
a3a328485c2e05df476068b9a94ef3ca	Fungi	Ascomycota	Dothideomycetes	Capnodiales	Cladosporiaceae	Cladosporium	Cladosporium sphaerospermum	0.98047	188
a4efb67f7ca29997e64f9fe45e0ebc46	Fungi	Basidiomycota	Tremellomycetes	Cystofilobasidiales	Mrakiaceae	Mrakia	Mrakia frigida	0.801567	403
a58fe8709e8b31c670c09bf99162795f	Fungi	Ascomycota	Saccharomycetes	Saccharomycetales	Pichiaceae	Brettanomyces	Brettanomyces anomalus	1	8646
a825d168baa9ab20ba187a74ba1ddcda	Fungi	Ascomycota	Dothideomycetes	Pleosporales	unidentified	unidentified	unidentified	0.728334	96
a8709c153079fb43fdc260fa7b5ae02b	Fungi	Ascomycota	Saccharomycetes	Saccharomycetales	Saccharomycetaceae	Kazachstania	Kazachstania unispora	0.984053	952830
a90adde2127eb5317671d75d1f8f7e67	Fungi	Ascomycota	Saccharomycetes	Saccharomycetales	Saccharomycetaceae	Kluyveromyces	Kluyveromyces lactis	0.997186	801
a9c94338d9752dad606acf380d2b5a75	Fungi	Basidiomycota	Tremellomycetes	Cystofilobasidiales	Mrakiaceae	Tausonia	Tausonia pullulans	1	1001
acf7afe28480942d7fdd880374ad91bd	Fungi	Ascomycota	Saccharomycetes	Saccharomycetales	Saccharomycetaceae	Torulaspora	Torulaspora delbrueckii	0.9693	2983
adb717824b6581270f7953a44e27d5bd	Fungi	Ascomycota	Sordariomycetes	Hypocreales	Ophiocordycipitaceae	Purpureocillium	Purpureocillium lilacinum	0.956586	42
af47301e7628fb08e7d06f39b748187c	Fungi	Ascomycota	Saccharomycetes	Saccharomycetales	Saccharomycetaceae	Kazachstania	Kazachstania unispora	0.986897	886663
b42dff450a07261724546f9a331a4b81	Fungi	Ascomycota	Saccharomycetes	Saccharomycetales	Pichiaceae	Brettanomyces	Brettanomyces anomalus	1	15021
b56739f490b0254b9b3e31312c5868fb	Fungi	Basidiomycota	Tremellomycetes	Trichosporonales	Trichosporonaceae	Cutaneotrichosporon	Cutaneotrichosporon curvatus	0.999332	595
b728b73ee4b8d3f0d5ee919822bcaf1f	Fungi	Ascomycota	Saccharomycetes	Saccharomycetales	Saccharomycetales	Candida	unidentified	0.999996	580
b7773b8db14d01ed37a9798cec061320	Fungi	Ascomycota	Saccharomycetes	Saccharomycetales	Saccharomycopsidaceae	Saccharomycopsis	Saccharomycopsis fibuligera	1	1718
b894e3ca5cd970241773781783f1f680	Fungi	Basidiomycota	Tremellomycetes	Tremellales	Tremellaceae	Cryptococcus	Cryptococcus uniguttulatus	1	69
bce77884c89c7b4370359465c9c913d0	Fungi	Ascomycota	Saccharomycetes	Saccharomycetales	Saccharomycetaceae	Kluyveromyces	Kluyveromyces lactis	0.997084	487
bd7a133355df7f2d8a5a87e71af5b6d0	Fungi	Ascomycota	Saccharomycetes	Saccharomycetales	Saccharomycetaceae	Kluyveromyces	Kluyveromyces marxianus	0.999843	12659
bfa4d2a4ae7fbc5ae95547c28d1c7ce3	Fungi	Ascomycota	Saccharomycetes	Saccharomycetales	Saccharomycetales	Candida	Candida parapsilosis	0.759968	900
c05af0d3c94d066e108f138ee16b83e5	Fungi	Ascomycota	Dothideomycetes	Pleosporales	Didymellaceae	Neoascochyta	Neoascochyta tardicrescens	0.841887	192
c2bfaea6d8e0a503175eb98864bb8605	Fungi	Ascomycota	Eurotiomycetes	Eurotiales	Aspergillaceae	Aspergillus	Aspergillus flavus	0.739259	206
c43ad055efb929c405bdd4e614ca4dff	Fungi	Ascomycota	Saccharomycetes	Saccharomycetales	Debaryomycetaceae	Yamadazyma	unidentified	0.850587	48
c5165dc165c7ef2b31552c14f3e223e1	Fungi	Ascomycota	Dothideomycetes	Capnodiales	Cladosporiaceae	Cladosporium	Cladosporium sphaerospermum	0.995536	483
c8660a33af2aa107532d6e726b3960aa	Fungi	Ascomycota	Saccharomycetes	Saccharomycetales	Pichiaceae	Brettanomyces	Brettanomyces anomalus	1	45
c9add6231af6133019ec16aeaa5af803	Fungi	Ascomycota	Sordariomycetes	Glomerellales	Plectosphaerellaceae	Lectera	unidentified	1	126
caa88167740ff5bd66b83cb5280b7adb	Fungi	Basidiomycota	Tremellomycetes	Trichosporonales	Trichosporonaceae	Trichosporon	Trichosporon ovoides	0.900539	9033
cd46a16e3a8964730689315e412e0c30	Fungi	Ascomycota	Saccharomycetes	Saccharomycetales	Saccharomycetales	Candida	Candida parapsilosis	0.816826	93
ceb3183d9222d32a31c4a75e1bff18a4	Fungi	Ascomycota	Saccharomycetes	Saccharomycetales	Saccharomycetales	Candida	unidentified	0.999989	109
d092616efb881066f4d41727cf858288	Fungi	Ascomycota	Saccharomycetes	Saccharomycetales	Saccharomycetales	Candida	Candida parapsilosis	0.761195	2406
d24ec5ed238979560fb2bb46f9a675a9	Fungi	Ascomycota	Dothideomycetes	Capnodiales	Cladosporiaceae	Cladosporium	Cladosporium sphaerospermum	0.985484	1403
d2a3ab485867a41b2dc828dee461e383	Fungi	Ascomycota	Dothideomycetes	Dothideales	Aureobasidiaceae	Aureobasidium	Aureobasidium pullulans	0.730959	684
d4056bcf9137812ffff48960ed4966a4	Fungi	Basidiomycota	Tremellomycetes	Trichosporonales	Trichosporonaceae	Trichosporon	Trichosporon ovoides	0.901399	258983
d4ce27d94e43ee5202877471de14eb87	Fungi	Basidiomycota	Tremellomycetes	Tremellales	Rhynchogastremataceae	Papiliotrema	Papiliotrema laurentii	0.999998	628
d6670de517dcac2d6b7e6e8e256fb86a	Fungi	Basidiomycota	Tremellomycetes	Trichosporonales	Trichosporonaceae	Trichosporon	Trichosporon ovoides	0.9115	1309
d7f11eda3c5236bbd1456ff3f0a1f373	Fungi	Basidiomycota	Tremellomycetes	Trichosporonales	Trichosporonaceae	Trichosporon	Trichosporon asahii	0.98158	3557
d81c9999fe382075f3d17a6c52560529	Fungi	Ascomycota	Dothideomycetes	Pleosporales	Lentitheciaceae	Keissleriella	Keissleriella quadriseptata	0.732532	60
dbb15892c8a32da2313b0b829e92eb0b	Fungi	Ascomycota	Saccharomycetes	Saccharomycetales	Saccharomycetaceae	Kazachstania	Kazachstania unispora	0.924874	44
e0af5a088ea37ef5ddc7828676b91935	Fungi	Ascomycota	Dothideomycetes	Pleosporales	Didymellaceae	Epicoccum	Epicoccum nigrum	0.712703	174
e18a463518b50215cfde5b250065859f	Fungi	Ascomycota	Dothideomycetes	Pleosporales	Didymellaceae	Neoascochyta	Neoascochyta triticicola	0.992778	318
e3a4747e1f0134ec6ced2b350f25ba45	Fungi	Ascomycota	Saccharomycetes	Saccharomycetales	Saccharomycetales	Candida	Candida zeylanoides	0.979142	8714
e4936ebb11e999a332578e826228d76a	Fungi	Basidiomycota	Tremellomycetes	Tremellales	Rhynchogastremataceae	Papiliotrema	Papiliotrema laurentii	0.999997	122
e4b0ce4995ecd98590e6fdb3b1aa2ceb	Fungi	Ascomycota	Dothideomycetes	Pleosporales	unidentified	unidentified	unidentified	0.999999	273
e4f92ad1f071dc1d22aa6d552d2bcbaf	Fungi	Ascomycota	Saccharomycetes	Saccharomycetales	Saccharomycetaceae	Kluyveromyces	Kluyveromyces lactis	0.997214	1002
e76ad46618d70533da4dcfc720794ee8	Fungi	Ascomycota	Eurotiomycetes	Eurotiales	Thermoascaceae	Thermoascus	Thermoascus aurantiacus	0.999995	145
e7f03d1d12bc7bac2148ee1c5a3a8c62	Fungi	Ascomycota	Dothideomycetes	Pleosporales	Phaeosphaeriaceae	Neostagonospora	Neostagonospora spinificis	0.895321	117
ea09aa15d47f42759fe61a1e1efb2ea3	Fungi	Ascomycota	Dothideomycetes	Pleosporales	Pleosporaceae	Alternaria	unidentified	0.999991	2589
eff0f292ad1a9a156ffde87a5d1cb14f	Fungi	Basidiomycota	Microbotryomycetes	Sporidiobolales	Sporidiobolaceae	Rhodotorula	Rhodotorula mucilaginosa	1	347
f09f71f61634d252b59481f2d135c046	Fungi	Basidiomycota	Tremellomycetes	Trichosporonales	Trichosporonaceae	Cutaneotrichosporon	Cutaneotrichosporon curvatus	0.999324	176
f5ef0a81327618485a32dc977c6c6c3d	Fungi	Ascomycota	Saccharomycetes	Saccharomycetales	Pichiaceae	Brettanomyces	Brettanomyces bruxellensis	0.986551	6166
f9723195a975afe802b5c10cb695da5c	Fungi	Ascomycota	Saccharomycetes	Saccharomycetales	Saccharomycetaceae	Kluyveromyces	Kluyveromyces lactis	0.998567	245
fe4dbd13832ee9140a69ae93d0dd3a42	Fungi	Ascomycota	Sordariomycetes	Hypocreales	Nectriaceae	Fusicolla	Fusicolla acetilerea	0.929609	287

## Sheet: Table S3
Table S3 Kruskal-Wallis test of category effects based on alpha diversity indexes.
		p-value
	Category	Shannon	Pielou evenness	observed features	Faith’s pd
Fungi	Industrial fermentation stage	0.1112	0.1077	0.2716	0.5691
	Traditional fermentation stage	0.01457	0.01732	0.1061	0.2453
Bacteria	Industrial fermentation stage	0.183	0.1858	0.2478	0.2265
	Traditional fermentation stage	0.1185	0.3003	0.03873	0.02401
Bold values indicate statistically significant results, p < 0.05

## Sheet: Table S4
Table S4 Permutational multivariate analysis of variance (PERMANOVA) of category effects based on unweighted and weighted Unifrac distances.
		Unweighted Unifrac		Weighted Unifrac
	Category	R2	p-value	R2	p-value
Fungi	Fermentation mode	0.04033	0.072	0.00256	0.91
	Fermentation stage	0.20534	0.316	0.41887	0.015
	Industrial stage	0.4521	0.616	0.69854	0.016
	Traditional stage	0.49241	0.006	0.84158	0.001
Bacteria	Fermentation mode	0.02525	0.263	0.00167	0.859
	Fermentation stage	0.53869	0.001	0.86151	0.001
	Industrial stage	0.67274	0.025	0.9804	0.012
	Traditional stage	0.72626	0.001	0.88332	0.001
Bold values indicate statistically significant results, p < 0.05
